# Supplementary material
Source: Elsevier journal article supplement (https://www.sciencedirect.com/science/article/pii/S0870255122000671)
Supplement: mmc1 [file S0870255122000671:mmc1.doc]

# Appendix 1

# Record form

Clinical file number: __________

Demographic variables

Age: ___ Gender: ____

Risk factors

- Smoking ___

- Hypertension ___

- Previous ischemic heart disease___

- Diabetes ____

- Obesity____

- Hypercholesterolemia___

- Chronic obstructive pulmonary disease_____

Clinical variables at admission

Heart rate______

Systolic blood pressure_____ Diastolic blood pressure______

Electrocardiographic variables

Electrocardiographic variables were measured in 12 leads:

| Variables | I | II | III | aVR | aVL | aVF | V1 | V2 | V3 | V4 | V5 | V6 |
| --- | --- | --- | --- | --- | --- | --- | --- | --- | --- | --- | --- | --- |
| QTi |  |  |  |  |  |  |  |  |  |  |  |  |
| QRS |  |  |  |  |  |  |  |  |  |  |  |  |
| RR distance |  |  |  |  |  |  |  |  |  |  |  |  |
| ST elevation, mm |  |  |  |  |  |  |  |  |  |  |  |  |
| ST depression |  |  |  |  |  |  |  |  |  |  |  |  |

Corrected QT, ms______

Corrected QT dispersion, ms______

QRS duration, ms________

QRS dispersion, ms_______

JT interval, ms________

ST elevation >1 mV: _______

ST depression >1 mV: ________

ST elevation in aVR: Yes:_____No:______

ST elevation in more than 6 leads: Yes:_______No:_____

Reperfusion therapy

Fibrinolysis: Yes:_____No: _______

No reperfusion Yes:_____No: _______

Drug therapy:

Beta-blocker: Yes:____No:_____

Angiotensin-converting enzyme inhibitor: Yes:____No:_____

Statin: Yes: ____ No: _____

Aspirin: Yes: ____ No: _____

Clopidogrel: Yes: ____ No: _____

Low molecular weight heparin: Yes: ____ No: _____

Dobutamine: Yes: ____ No: _____

Killip class

I _____ II ______ III ________ IV ______

Myocardial infarction location

Anteroapical: ______

Large anterior: _____

Mid-anterior: ______

Inferior: ______

Inferior plus right ventricle: ______

Inferolateral: ______

Lateral: _______

Septal: _______

Other variables:

Glycemia ________Hemoglobin_______ White blood cell count______

Cholesterol ________ Leukocytes ________ Hematocrit______

Peak creatine kinase_______

Creatinine (for calculating glomerular filtration rate) ________

Glomerular filtration rate:________

Left ventricular ejection fraction _______

Sodium: ________ Potassium: ____________ Chlorine: _______ Magnesium: ______-

Complications: Yes _____ No______

- Cardiac rupture ____

- Ventricular tachycardia_____

- within 48 hours of symptoms onset: ______ After 48 hours: ______

- Ventricular fibrillation ______

- within 48 hours of symptoms onset: ______ After 48 hours: ______

- Other complications (please describe): __________________________________

- Status: Living _____ Deceased ____
